# Supplementary material for: High-level over-expression, purification, and crystallization of a novel phospholipase C/sphingomyelinase from Pseudomonas aeruginosa
Source: PubMed Central journal article supplement (PMC3601568; doi:10.1016/j.pep.2012.11.005), 2013-07

**Figure S1a**

Deconvoluted MS-ESI TOF of the L-selenomethionine substituted PlcHR2, (a) showing the entire mass range from 10000 to 90000 kDa with the peaks corresponding to PlcR2 clearly showing up around 16996 Da, and (b) a close-up around the expected molecular weight of PlcH.

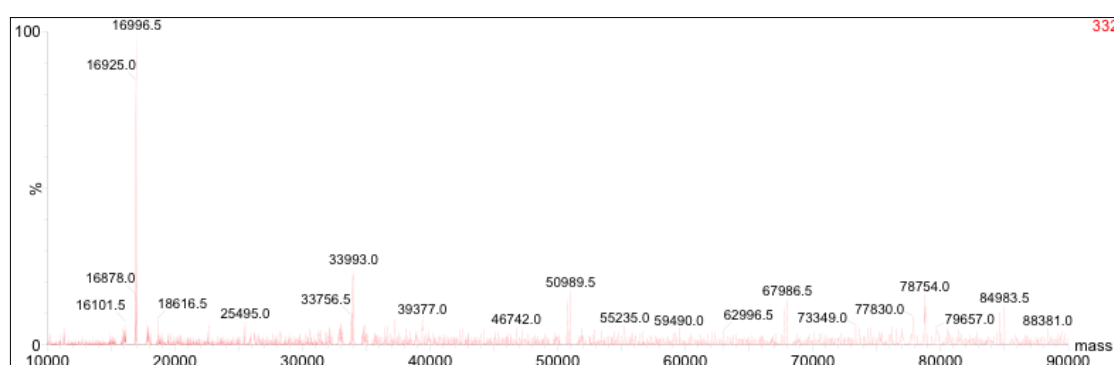

**Figure S1b**

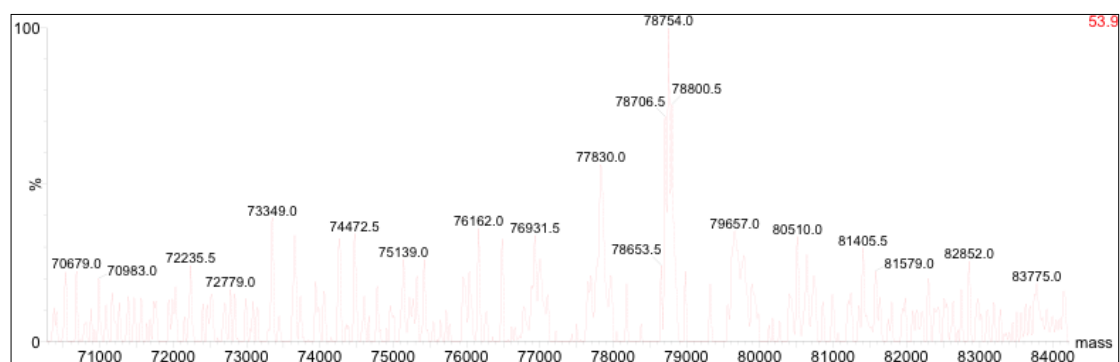

Supplement: NIHMS425152-supplement-01.pdf [file NIHMS425152-supplement-01.pdf]
